# Supplementary material for: Neglected Spleen Transcriptional Profile Reveals Inflammatory Disorder Conferred by Rabbit Hemorrhagic Disease Virus 2 Infection
Source: MDPI journal article supplement (doi:10.3390/v16040495), 2024-03-23
Supplement: s1 [file s1]

**Table S1.** Sequences of the PCR primers used in this study.

| Primers  | Nucleotide sequence (5'–3') | PCR product length (bp) | Source               |
|----------|-----------------------------|-------------------------|----------------------|
| RHDV2-qF | TGGAACCTGGCTTGAGTGTGA       | 127                     | This study           |
| RHDV2-qR | ACAAGCGTGCTTGTGGACGG        |                         |                      |
| RHDV2-F  | ACTACTAGCGTGGTCACCACC       | 481                     | Velarde et al., 2017 |
| RHDV2-R  | TTGTTATAAACGCTCAGGACCAAC    |                         |                      |
| IL1A-F   | CTGCCATTGACCATCTTTC         | 253                     | This study           |
| IL1A-R   | TACTGCCACCACATTCTCC         |                         |                      |
| IL-6-F   | GAGCATCCTGGAGACCATCAA       | 82                      | Delgado et al., 2019 |
| IL-6-R   | CCAGTGCCTCCTTTCTGTTCA       |                         |                      |
| IL-8-F   | CCACACCTTTCCATCCCAAAT       | 122                     | Schnupf et al., 2012 |
| IL-8-R   | CTTCTGCACCCACTTTTCCTTG      |                         |                      |
| IL-22-F  | GCAACAATCTCAGCCAATG         | 104                     | This study           |
| IL-22-R  | TCTCTCCACTCTCTCCAAGC        |                         |                      |
| CCL2-F   | CTCCAGCATGAAGGTCTC          | 131                     | Li et al., 2014      |
| CCL2-R   | GCTCATTAGCCTCTTCACTG        |                         |                      |
| CXCL9-F  | AATGAGGAATGGACGCTG          | 172                     | This study           |
| CXCL9-R  | TCACCTTGGTTGAATCCG          |                         |                      |
| NMUR1-F  | ACAGGTGACCAAGATGCTG         | 167                     | This study           |
| NMUR1-R  | GAGCCGAGGTAGAAGAAGAC        |                         |                      |
| HSPB7-F  | TCCACTCTGCCTCACTTAGG        | 186                     | This study           |
| HSPB7-R  | GAGACTCCACAGGTCAAAGG        |                         |                      |
| KCNIP2-F | TACCGAGGCTTCAAGAACG         | 130                     | This study           |
| KCNIP2-R | GTTGGTGTCAAAGGCATTG         |                         |                      |
| GAPDH-F  | TGACGACATCAAGAAGGTGGTG      | 120                     | Schnupf et al., 2012 |
| GAPDH-R  | GAAGGTGGAGGAGTGGGTGTC       |                         |                      |
