# Supplementary figures and images for: Neglected Spleen Transcriptional Profile Reveals Inflammatory Disorder Conferred by Rabbit Hemorrhagic Disease Virus 2 Infection
Source: MDPI journal article supplement (doi:10.3390/v16040495), 2024-03-23

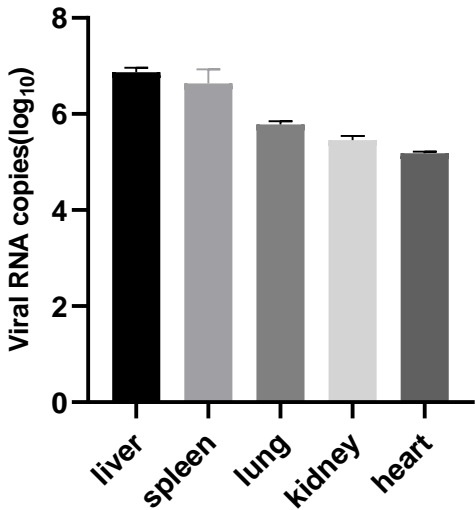

Supplement: s1 [file s1]
